# Supplementary material
Source: ML conference proceedings conference paper supplement (https://openaccess.thecvf.com/content/WACV2024/html/Moreira_Hyperbolic_vs_Euclidean_WACV_2024_paper.html)
Supplement: Supplementary file 1 [file Moreira_Hyperbolic_vs_Euclidean_WACV_2024_supplemental.zip]

# Hyperbolic vs Euclidean Embeddings in Few-Shot Learning: Two Sides of the Same Coin

## Supplementary Material

### A. The hyperboloid model

Consider the upper-sheet of a  $d$ -dimensional hyperboloid  $H_k^d \subset \mathbb{R}^{d,1}$  as defined in (2). At each of its points  $\mathbf{x} \in H_k^d$ , we have the tangent space as  $T_{\mathbf{x}}H_k^d = \{\mathbf{v} \in \mathbb{R}^{d,1} : \langle \mathbf{x}, \mathbf{v} \rangle_L = 0\}$ . For  $\mathbf{v} \in T_{\mathbf{x}}H_k^d$ , there is a unique geodesic  $\gamma_{\mathbf{v}} : \mathbb{R} \rightarrow H_k^d$  such that  $\gamma_{\mathbf{v}}'(0) = \mathbf{v}$ . The exponential map  $\text{Exp}_{\mathbf{x}}^H : TH_k^d \rightarrow H_k^d$  is defined as  $\text{Exp}_{\mathbf{x}}^H(\mathbf{v}) := \gamma_{\mathbf{v}}(1)$ ,

$$\text{Exp}_{\mathbf{x}}^H(\mathbf{v}) := \gamma_{\mathbf{v}}(1) = \cosh(\|\mathbf{v}\|_L \sqrt{-k}) \mathbf{x} + \frac{\sinh(\|\mathbf{v}\|_L \sqrt{-k}) \mathbf{v}}{\|\mathbf{v}\|_L \sqrt{-k}}, \quad (23)$$

where  $\|\mathbf{v}\|_L = \sqrt{\langle \mathbf{v}, \mathbf{v} \rangle_L}$ , with  $\langle \cdot, \cdot \rangle_L$  the Lorentz pseudometric (1). Given two points  $\mathbf{x}, \mathbf{y} \in H_k^d$ , the hyperbolic distance  $d_{H_k^d}(\mathbf{x}, \mathbf{y})$  is obtained by integrating the velocity of the geodesic between them,

$$d_{H_k^d}(\mathbf{x}, \mathbf{y}) := \frac{1}{\sqrt{-k}} \text{acosh}(k \langle \mathbf{x}, \mathbf{y} \rangle_L). \quad (24)$$

We can verify that the hyperboloid  $H_k^d$  and the Poincaré ball  $P_k^d$  are isometric models of  $d$ -dimensional hyperbolic space with curvature  $k$  i.e., for  $\mathbf{x}, \mathbf{y} \in H_k^d$

$$d_{H_k^d}(\mathbf{x}, \mathbf{y}) = d_{P_k^d}(\Pi(\mathbf{x}), \Pi(\mathbf{y})), \quad (25)$$

where  $\Pi$  is the stereographic projection defined in (4). A comparison of geometries with constant positive, zero and negative curvature is presented in Table 6. Note that  $\langle \cdot, \cdot \rangle_E$  denotes the Euclidean inner product (dot product).

| Manifold                                    | Curvature | Geodesic $d(\mathbf{x}, \mathbf{y})$                                           |
|---------------------------------------------|-----------|--------------------------------------------------------------------------------|
| Euclidean $\mathbb{R}^d$                    | $k = 0$   | $\sqrt{\langle \mathbf{x} - \mathbf{y}, \mathbf{x} - \mathbf{y} \rangle_E}$    |
| Spherical $S_k^d \subset \mathbb{R}^{d+1}$  | $k > 0$   | $\frac{1}{\sqrt{k}} \text{acos}(k \langle \mathbf{x}, \mathbf{y} \rangle_E)$   |
| Hyperbolic $H_k^d \subset \mathbb{R}^{d,1}$ | $k < 0$   | $\frac{1}{\sqrt{-k}} \text{acosh}(k \langle \mathbf{x}, \mathbf{y} \rangle_L)$ |

Table 6. Overview of the different isotropic geometries.

**Hyperbolic distance for fixed-radius embeddings** Consider  $\mathbf{x}$  and  $\mathbf{y}$  in  $P_k^d$  such that  $\|\mathbf{x}\|_2 = \|\mathbf{y}\|_2 = r$  and  $\angle(\mathbf{x}, \mathbf{y}) = \alpha$ . The hyperbolic distance between  $\mathbf{x}$  and  $\mathbf{y}$  can be computed using (25). Recall that  $\lambda(\mathbf{u}) = 2/(1 + k\|\mathbf{u}\|_2^2)$ . We have then

$$\begin{aligned} \langle \Pi^{-1}(\mathbf{x}), \Pi^{-1}(\mathbf{y}) \rangle_L &= \lambda(\mathbf{x})\lambda(\mathbf{y}) \langle \mathbf{x}, \mathbf{y} \rangle_E + \frac{1}{k}(\lambda(\mathbf{x}) - 1)(\lambda(\mathbf{y}) - 1) \\ &= \frac{4}{(1 + kr^2)^2} r^2 \cos(\alpha) + \frac{1}{k} \left( \frac{1 - kr^2}{1 + kr^2} \right)^2. \end{aligned} \quad (26)$$

Plugging this in (24) yields expression (21),

$$d_{P_k^d}(\mathbf{x}, \mathbf{y}) = d_{H_k^d}(\Pi^{-1}(\mathbf{x}), \Pi^{-1}(\mathbf{y})) = \frac{1}{\sqrt{-k}} \text{acosh} \left( \frac{4kr^2}{(1 + kr^2)^2} \cos(\alpha) + \left( \frac{1 - kr^2}{1 + kr^2} \right)^2 \right). \quad (27)$$

### B. Models

**Backbone** Similarly to [13], the convolutional backbone used in all experiments consists of a sequence of 4 convolutional blocks, each of which composed of  $3 \times 3$  2D Convolutions with 64 filters and stride 1, 2D Batch Normalization, ReLU activation and 2D MaxPool. The 4th block has as many filters as dimensions in the output manifold.

**Scheduler** A StepLR scheduler was used to train all models. In the CUB dataset, the initial learning rate of  $10^{-3}$  is decayed by a factor of 0.8 every 40 epochs both in the 1s5w and the 5s5w few-shot settings. In the MiniImageNet dataset, the initial learning rate of  $5 \times 10^{-3}$  is decayed by a factor of 0.5 every 80 epochs in the 1s5w setting (trained as 1s30w), and by 0.5 every 60 epochs in the 5s5w scenario (trained as 5s20w).

**Image transformations** In the case of the CUB\_200\_2011, we crop the images according to the bounding boxes provided in the dataset before other image transformations. The data augmentations performed during training were: 1) Zero padding along the smallest dimension to produce a square image; 2) Random crop resized to  $84 \times 84 \times 3$ ; 3) Image jitter with 0.4 brightness, 0.4 contrast and 0.4 hue; 4) Random horizontal flip; 5) Normalization. At test time, the images were zero padded, resized to  $84 \times 84$  and normalized.
